# Supplementary material for: The Fe–V Cofactor of Vanadium Nitrogenase Contains an Interstitial Carbon Atom
Source: PubMed Central journal article supplement — Angew Chem Int Ed Engl. 2015 Sep 17;54(45):13249–52. doi: 10.1002/anie.201505930 (PMC4675075; doi:10.1002/anie.201505930), 2015-09-17
Supplement: anie0054-13249-sd1.pdf [file anie0054-13249-sd1.pdf]

## Supporting Information

### **The Fe–V Cofactor of Vanadium Nitrogenase Contains an Interstitial Carbon Atom**

*Julian A. Rees, Ragnar Bjornsson, Julia Schlesier, Daniel Sippel, Oliver Einsle, and Serena DeBeer\**

anie\_201505930\_sm\_miscellaneous\_information.pdf

## Contents

Geometry-optimized coordinates of 225 atom models of FeMoco and FeVco.

## FeMoco

|    |           |            |           |
|----|-----------|------------|-----------|
| Fe | 10.114690 | -7.703790  | 55.997150 |
| Fe | 12.592775 | -8.339455  | 55.593136 |
| Fe | 11.356470 | -7.022600  | 53.763435 |
| Fe | 11.989671 | -5.848783  | 55.995784 |
| Fe | 14.842328 | -7.594401  | 54.593006 |
| Fe | 13.612667 | -6.211558  | 52.817352 |
| Fe | 14.234095 | -5.136327  | 54.988659 |
| Mo | 16.077071 | -5.653495  | 53.244568 |
| C  | 13.102740 | -6.709656  | 54.635949 |
| S  | 11.807082 | -7.458315  | 57.529824 |
| S  | 16.171063 | -6.063151  | 55.523514 |
| S  | 9.960555  | -5.706635  | 54.999953 |
| S  | 13.080692 | -4.002049  | 56.434792 |
| S  | 14.474498 | -9.492158  | 55.653370 |
| S  | 14.345906 | -4.097768  | 53.045264 |
| S  | 10.859698 | -9.137724  | 54.335204 |
| S  | 15.240920 | -7.632743  | 52.391762 |
| S  | 11.782288 | -6.521044  | 51.634265 |
| S  | 8.472275  | -8.499543  | 57.326499 |
| C  | 13.316384 | -2.413022  | 49.965591 |
| N  | 12.425824 | -3.225190  | 50.780743 |
| C  | 11.214124 | -2.866263  | 51.225022 |
| N  | 10.617098 | -1.750139  | 50.745069 |
| N  | 10.601417 | -3.600968  | 52.165990 |
| C  | 15.063349 | -1.104757  | 59.472637 |
| C  | 16.188172 | -0.874018  | 58.459017 |
| C  | 17.508370 | -1.552718  | 58.851301 |
| O  | 17.846567 | -1.662403  | 60.041149 |
| N  | 18.260644 | -1.971887  | 57.810564 |
| C  | 8.309011  | -1.265150  | 60.668388 |
| C  | 9.374563  | -2.061132  | 59.971486 |
| N  | 9.875068  | -3.240159  | 60.503655 |
| C  | 9.991673  | -1.799698  | 58.749682 |
| C  | 10.769159 | -3.680906  | 59.620493 |
| N  | 10.872615 | -2.844130  | 58.547194 |
| C  | 8.218378  | -4.722853  | 49.893699 |
| C  | 7.616688  | -4.456436  | 51.253789 |
| C  | 6.932230  | -3.258140  | 51.549364 |
| C  | 7.714039  | -5.417041  | 52.289939 |
| C  | 6.363728  | -3.027760  | 52.816367 |
| C  | 7.145403  | -5.207436  | 53.550653 |
| C  | 6.462765  | -4.004559  | 53.826707 |
| O  | 5.935693  | -3.849413  | 55.071069 |
| N  | 5.189974  | -10.309180 | 55.594579 |
| C  | 6.173738  | -9.891618  | 56.595389 |
| C  | 5.372065  | -9.531258  | 57.863129 |
| O  | 4.442077  | -8.724396  | 57.807398 |
| C  | 7.068687  | -8.715081  | 56.169104 |
| N  | 5.716086  | -10.192512 | 59.005750 |
| C  | 18.209415 | -9.757026  | 57.686986 |
| O  | 19.094079 | -9.519956  | 58.511731 |
| N  | 17.022321 | -9.107395  | 57.576854 |
| C  | 16.598814 | -8.045138  | 58.475762 |
| C  | 15.682461 | -8.583320  | 59.581185 |
| O  | 16.125776 | -9.030411  | 60.643646 |
| N  | 14.347209 | -8.554528  | 59.278089 |
| C  | 13.348425 | -8.982731  | 60.229504 |
| C  | 12.513295 | -10.226553 | 59.894688 |

|   |           |            |           |
|---|-----------|------------|-----------|
| O | 11.820462 | -10.754613 | 60.773442 |
| N | 12.566638 | -10.670934 | 58.603392 |
| C | 11.638728 | -11.692323 | 58.154002 |
| C | 12.246939 | -12.884970 | 57.402563 |
| O | 11.818778 | -14.037342 | 57.567835 |
| N | 13.244929 | -12.587316 | 56.525002 |
| C | 13.844459 | -13.595855 | 55.652239 |
| C | 14.385877 | -12.950584 | 54.370619 |
| C | 13.298223 | -12.256689 | 53.530919 |
| C | 13.906853 | -11.237475 | 52.565863 |
| N | 12.863176 | -10.515558 | 51.830452 |
| C | 13.085663 | -9.875832  | 50.675674 |
| N | 14.352179 | -9.731156  | 50.219331 |
| N | 12.048040 | -9.448131  | 49.915097 |
| O | 22.411739 | -6.803003  | 47.266653 |
| C | 18.105430 | -7.432453  | 50.611331 |
| C | 18.655893 | -7.288474  | 51.993059 |
| N | 18.048628 | -6.623504  | 53.059307 |
| C | 19.899455 | -7.698697  | 52.420946 |
| C | 18.924365 | -6.615980  | 54.069419 |
| N | 20.044831 | -7.265925  | 53.720731 |
| C | 17.605447 | -1.196886  | 54.030510 |
| C | 17.113047 | -1.730929  | 52.686509 |
| C | 17.733656 | -3.116261  | 52.428623 |
| C | 19.274227 | -3.030538  | 52.305364 |
| C | 19.850566 | -4.143129  | 51.438790 |
| C | 21.327351 | -4.462273  | 51.592237 |
| C | 17.145550 | -3.744169  | 51.164338 |
| O | 17.454147 | -1.970150  | 55.018923 |
| O | 18.139272 | -0.052009  | 54.084097 |
| O | 21.897733 | -4.945974  | 50.553215 |
| O | 21.890332 | -4.309169  | 52.702098 |
| O | 16.609054 | -4.901531  | 51.303459 |
| O | 17.251489 | -3.161760  | 50.073394 |
| O | 17.404062 | -3.972800  | 53.533269 |
| O | 15.606667 | -5.093831  | 47.074467 |
| O | 20.552808 | -3.046822  | 45.680199 |
| O | 20.972620 | -2.045375  | 56.442518 |
| O | 14.512807 | -5.469426  | 49.697130 |
| O | 21.343511 | -7.627457  | 49.656651 |
| O | 20.916164 | -4.711191  | 48.061396 |
| O | 18.255575 | -4.325647  | 47.685024 |
| O | 23.742744 | -5.613666  | 54.168320 |
| O | 18.533916 | -0.792434  | 49.483149 |
| O | 20.524911 | -4.348752  | 55.182937 |
| O | 20.000088 | 0.412451   | 55.962220 |
| O | 19.851302 | 2.019696   | 49.636455 |
| O | 19.539557 | 0.461747   | 51.901217 |
| H | 14.082119 | -3.083444  | 49.569066 |
| H | 13.793218 | -1.622571  | 50.558625 |
| H | 12.780072 | -1.969227  | 49.118590 |
| H | 12.794102 | -4.108348  | 51.142286 |
| H | 11.168526 | -1.085199  | 50.221246 |
| H | 9.605516  | -3.487506  | 52.320064 |
| H | 10.973545 | -4.542895  | 52.353388 |
| H | 14.196153 | -0.475855  | 59.240593 |
| H | 15.421767 | -0.867723  | 60.480642 |
| H | 14.734345 | -2.150516  | 59.460517 |
| H | 15.887702 | -1.201002  | 57.455680 |
| H | 16.412015 | 0.201199   | 58.387689 |

|   |           |            |           |
|---|-----------|------------|-----------|
| H | 17.955102 | -1.873349  | 56.838672 |
| H | 19.211769 | -2.294214  | 57.950835 |
| H | 7.965700  | -0.438038  | 60.037629 |
| H | 8.678701  | -0.845491  | 61.614178 |
| H | 7.447731  | -1.901971  | 60.907126 |
| H | 11.482411 | -3.012299  | 57.741284 |
| H | 9.872795  | -0.997976  | 58.031776 |
| H | 11.351522 | -4.592883  | 59.694272 |
| H | 8.453303  | -3.787070  | 49.373475 |
| H | 7.525925  | -5.293520  | 49.259433 |
| H | 9.143064  | -5.305236  | 49.986314 |
| H | 6.839920  | -2.488806  | 50.782559 |
| H | 8.275183  | -6.334345  | 52.117263 |
| H | 5.845810  | -2.090325  | 53.020647 |
| H | 7.249860  | -5.944614  | 54.340567 |
| H | 5.543892  | -2.969166  | 55.147792 |
| H | 5.649599  | -10.370942 | 54.686968 |
| H | 4.501028  | -9.558595  | 55.518842 |
| H | 6.831217  | -10.743910 | 56.814400 |
| H | 6.468417  | -7.798214  | 56.119465 |
| H | 7.459995  | -8.929901  | 55.167331 |
| H | 6.623268  | -10.639433 | 59.056480 |
| H | 5.324737  | -9.851313  | 59.876143 |
| H | 18.317133 | -10.542839 | 56.912461 |
| H | 16.352499 | -9.390198  | 56.857610 |
| H | 16.094033 | -7.270201  | 57.889125 |
| H | 17.488381 | -7.628146  | 58.954766 |
| H | 14.034563 | -8.091914  | 58.425492 |
| H | 12.624934 | -8.176437  | 60.407619 |
| H | 13.865966 | -9.191294  | 61.170720 |
| H | 13.027368 | -10.073981 | 57.917589 |
| H | 11.140540 | -12.084535 | 59.042750 |
| H | 10.872892 | -11.239997 | 57.504121 |
| H | 13.577054 | -11.627095 | 56.430974 |
| H | 14.660159 | -14.115832 | 56.174909 |
| H | 13.071802 | -14.343027 | 55.435902 |
| H | 15.141569 | -12.203910 | 54.653177 |
| H | 14.899350 | -13.718308 | 53.777482 |
| H | 12.698266 | -12.994420 | 52.981507 |
| H | 12.620815 | -11.712194 | 54.203849 |
| H | 14.506300 | -10.521813 | 53.148042 |
| H | 14.552750 | -11.729081 | 51.828272 |
| H | 12.023266 | -10.256792 | 52.357305 |
| H | 14.490273 | -9.241918  | 49.344006 |
| H | 15.079424 | -9.588522  | 50.915230 |
| H | 12.180366 | -8.558434  | 49.444100 |
| H | 23.330393 | -6.508674  | 47.274983 |
| H | 21.870864 | -5.991776  | 47.429496 |
| H | 18.923895 | -7.737699  | 49.951116 |
| H | 17.689554 | -6.489805  | 50.248734 |
| H | 17.303605 | -8.180622  | 50.566094 |
| H | 20.672830 | -8.222694  | 51.880811 |
| H | 18.800442 | -6.103657  | 55.011499 |
| H | 16.022399 | -1.841622  | 52.740985 |
| H | 17.365627 | -1.063541  | 51.859719 |
| H | 19.541736 | -2.052939  | 51.891630 |
| H | 19.666519 | -3.103262  | 53.325669 |
| H | 19.345799 | -5.086962  | 51.684290 |
| H | 19.645966 | -3.944853  | 50.383027 |
| H | 16.557081 | -4.977546  | 47.260968 |

|   |           |           |           |
|---|-----------|-----------|-----------|
| H | 15.208364 | -5.293913 | 47.939992 |
| H | 20.658905 | -3.872120 | 45.187612 |
| H | 19.678178 | -3.153620 | 46.096736 |
| H | 21.766644 | -1.921646 | 56.975942 |
| H | 20.618708 | -1.136051 | 56.260836 |
| H | 15.292492 | -5.309726 | 50.274751 |
| H | 13.894989 | -5.984554 | 50.245236 |
| H | 21.828538 | -7.494733 | 48.814308 |
| H | 21.375800 | -6.743019 | 50.065050 |
| H | 21.275608 | -4.650431 | 48.993884 |
| H | 21.104793 | -3.887330 | 47.577359 |
| H | 19.135600 | -4.673373 | 47.939202 |
| H | 17.901770 | -3.886790 | 48.484840 |
| H | 24.495630 | -5.834248 | 53.604850 |
| H | 23.124168 | -5.114465 | 53.571260 |
| H | 18.927022 | -0.501383 | 50.325306 |
| H | 18.071230 | -1.626023 | 49.696796 |
| H | 20.687106 | -3.478572 | 55.600582 |
| H | 20.984751 | -4.311914 | 54.324709 |
| H | 20.609893 | 0.870359  | 55.368459 |
| H | 19.201791 | 0.248679  | 55.392978 |
| H | 19.367425 | 1.360195  | 49.117838 |
| H | 19.720233 | 1.683846  | 50.542538 |
| H | 20.409897 | 0.153968  | 52.186029 |
| H | 18.950918 | 0.359428  | 52.702384 |
| H | 20.888560 | -7.383400 | 54.327013 |
| H | 9.833968  | -1.368058 | 51.257433 |
| H | 11.130253 | -9.531265 | 50.337970 |
| C | 23.423591 | -8.025902 | 52.090595 |
| C | 24.594596 | -7.467753 | 51.291413 |
| O | 25.669951 | -8.083136 | 51.178192 |
| N | 24.384662 | -6.235359 | 50.751332 |
| C | 25.386619 | -5.627016 | 49.892543 |
| C | 24.767845 | -4.525655 | 49.023980 |
| O | 22.298862 | -7.556026 | 55.236596 |
| H | 17.346543 | -3.350389 | 54.345803 |
| H | 23.080988 | -7.317130 | 52.842857 |
| H | 23.739240 | -8.957282 | 52.567397 |
| H | 22.607203 | -8.212979 | 51.383416 |
| H | 23.453909 | -5.788887 | 50.794369 |
| H | 26.204923 | -5.207831 | 50.498231 |
| H | 25.838195 | -6.411758 | 49.270537 |
| H | 24.340503 | -3.729918 | 49.643640 |
| H | 23.952123 | -4.935911 | 48.419877 |
| H | 25.522670 | -4.092421 | 48.358913 |
| H | 22.888649 | -6.825622 | 54.914125 |
| H | 22.782379 | -8.370279 | 55.048978 |

## FeVco

|    |                   |                   |                   |
|----|-------------------|-------------------|-------------------|
| Fe | 10.06665618106691 | -7.72920787434537 | 56.08067386623114 |
| Fe | 12.58277956978973 | -8.37900718752773 | 55.65506007634426 |
| Fe | 11.30538416389474 | -7.06686187740933 | 53.78562181287211 |
| Fe | 11.97717881867746 | -5.84751057013968 | 56.07621774479177 |
| Fe | 14.86266080982731 | -7.62893603064411 | 54.65543456008214 |
| Fe | 13.59522126237661 | -6.24259950347247 | 52.82373090422340 |
| Fe | 14.22689199744966 | -5.10597386906711 | 55.01891501243668 |

|   |                   |                    |                   |
|---|-------------------|--------------------|-------------------|
| V | 16.18064042709096 | -5.68218785570081  | 53.20723801524418 |
| C | 13.08219632481630 | -6.74124572668077  | 54.68264077448573 |
| S | 11.78052034145107 | -7.47848968294182  | 57.61743260629350 |
| S | 16.22019439653405 | -6.00271589950703  | 55.49849779593968 |
| S | 9.91821732600423  | -5.72115738602787  | 55.07352310352677 |
| S | 13.09907509784662 | -4.01963821229400  | 56.57683787745588 |
| S | 14.46114995800933 | -9.57093917143504  | 55.71858123502280 |
| S | 14.38455681637458 | -4.11084801844825  | 53.01736435989789 |
| S | 10.80746387071428 | -9.20502759925486  | 54.40929358119582 |
| S | 15.28743668654594 | -7.64941217360487  | 52.41388267079939 |
| S | 11.71019794566769 | -6.56387262042048  | 51.63647010806233 |
| S | 8.39481523167303  | -8.47684921451968  | 57.42633741516953 |
| C | 13.31638401160193 | -2.41302199869100  | 49.96559102590154 |
| N | 12.42582395363956 | -3.22519004052874  | 50.78074290009194 |
| C | 11.21412412870424 | -2.86626298133521  | 51.22502212277942 |
| N | 10.61709796971411 | -1.75013900108112  | 50.74506897096298 |
| N | 10.60141689996648 | -3.60096802991584  | 52.16598992853930 |
| C | 15.06334901221608 | -1.10475698027112  | 59.47263699925013 |
| C | 16.18817193164066 | -0.87401804530651  | 58.45901698746828 |
| C | 17.50837016924337 | -1.55271789351203  | 58.85130102938035 |
| O | 17.84656695100814 | -1.66240303755265  | 60.04114898284882 |
| N | 18.26064391177471 | -1.97188705459007  | 57.81056400788281 |
| C | 8.30901099530165  | -1.26515000342258  | 60.66838800032072 |
| C | 9.37456300512751  | -2.06113199595091  | 59.97148599955102 |
| N | 9.87506799737523  | -3.24015900152209  | 60.50365499627240 |
| C | 9.99167300571269  | -1.79969799998963  | 58.74968200172899 |
| C | 10.76915900002499 | -3.68090599734465  | 59.62049300814185 |
| N | 10.87261499577986 | -2.84413000420620  | 58.54719398978931 |
| C | 8.21837800417380  | -4.72285303682557  | 49.89369906892578 |
| C | 7.61668799757506  | -4.45643590242411  | 51.25378886305576 |
| C | 6.93223000851967  | -3.25814006312559  | 51.54936407701768 |
| C | 7.71403911302380  | -5.41704094237655  | 52.28993906789410 |
| C | 6.36372796356810  | -3.02776000082182  | 52.81636697678010 |
| C | 7.14540288409979  | -5.20743608091442  | 53.55065296553154 |
| C | 6.46276507346937  | -4.00455895960756  | 53.82670701882559 |
| O | 5.93569300254142  | -3.84941300305243  | 55.07106899914216 |
| N | 5.18997399814692  | -10.30918001173405 | 55.59457899557496 |
| C | 6.17373799495537  | -9.89161797842726  | 56.59538900295792 |
| C | 5.37114741702238  | -9.53183790966148  | 57.86220833475056 |
| O | 4.44207700829194  | -8.72439599938614  | 57.80739799645098 |
| C | 7.06414175135246  | -8.71100806430540  | 56.19022902408263 |
| N | 5.71608599976949  | -10.19251200508050 | 59.00575000191476 |
| C | 18.20941498862276 | -9.75702601600074  | 57.68698599939582 |
| O | 19.09407900456024 | -9.51995599426989  | 58.51173100078024 |
| N | 17.02232102156402 | -9.10739497435354  | 57.57685399885823 |
| C | 16.59881398956715 | -8.04513802877832  | 58.47576200765151 |
| C | 15.68246101108924 | -8.58331994962198  | 59.58118499482923 |
| O | 16.12577600117538 | -9.03041102107562  | 60.64364599707933 |
| N | 14.34720902476877 | -8.55452805102573  | 59.27808900985899 |
| C | 13.34842493871262 | -8.98273094575736  | 60.22950396839815 |
| C | 12.51329521720782 | -10.22655314697091 | 59.89468809598946 |
| O | 11.82046194450553 | -10.75461296518024 | 60.77344198745303 |
| N | 12.56663778407901 | -10.67093380484409 | 58.60339186370370 |
| C | 11.63872808539059 | -11.69232310874084 | 58.15400208249857 |
| C | 12.24693895406611 | -12.88496990650788 | 57.40256295665748 |
| O | 11.81877798754821 | -14.03734202168436 | 57.56783498891708 |
| N | 13.24492907869319 | -12.58731607894113 | 56.52500204271398 |
| C | 13.84445896562783 | -13.59585497644009 | 55.65223900256934 |
| C | 14.38587701163932 | -12.95058398928115 | 54.37061899940487 |
| C | 13.29822300734190 | -12.25668899772712 | 53.53091899723149 |

|   |                   |                    |                   |
|---|-------------------|--------------------|-------------------|
| C | 13.90685296585078 | -11.23747502499924 | 52.56586298736303 |
| N | 12.86317605517258 | -10.51555798457570 | 51.83045201069842 |
| C | 13.08566293430253 | -9.87583199822217  | 50.67567399425540 |
| N | 14.35217902712681 | -9.73115599939598  | 50.21933100171135 |
| N | 12.04804001580772 | -9.44813100842709  | 49.91509700290752 |
| O | 22.41173899243418 | -6.80300299309927  | 47.26665300812319 |
| C | 18.10543000033571 | -7.43245299992693  | 50.61133099711081 |
| C | 18.66327439597313 | -7.35174810086762  | 51.99321740959866 |
| N | 18.07348560869041 | -6.67806479558616  | 53.05745137573169 |
| C | 19.88539600218375 | -7.82580320105410  | 52.41858571089556 |
| C | 18.93678470394589 | -6.72812609224335  | 54.07134049889316 |
| N | 20.03512630249169 | -7.42273445131863  | 53.72735561070878 |
| C | 17.62106100239840 | -1.21475216294637  | 54.04539129022421 |
| C | 17.11606132195027 | -1.75315055494611  | 52.70716843969404 |
| C | 17.75884393329219 | -3.12412888042451  | 52.41462984544750 |
| C | 19.29452480894392 | -3.01640924212517  | 52.25053232905003 |
| C | 19.85727154965518 | -4.22188733338566  | 51.50451562619888 |
| C | 21.34709606794287 | -4.47902787371764  | 51.60067865573090 |
| C | 17.15654953529355 | -3.75421408194395  | 51.15065606101057 |
| O | 17.46082637635497 | -1.95998498897880  | 55.04523269882966 |
| O | 18.18257356906622 | -0.07211786629718  | 54.07537997806329 |
| O | 21.90861132758066 | -4.94334124418498  | 50.54553604419028 |
| O | 21.94082961409434 | -4.29709482703218  | 52.69110941242423 |
| O | 16.63818238782730 | -4.90758579537934  | 51.30256652768080 |
| O | 17.25040659911778 | -3.15957273962754  | 50.05486638062890 |
| O | 17.47218355597652 | -4.01896472957091  | 53.49184795090382 |
| O | 15.60666700268119 | -5.09383100223536  | 47.07446698838238 |
| O | 20.55280799281125 | -3.04682199764652  | 45.68019899405552 |
| O | 20.97262002343478 | -2.04537498649150  | 56.44251799448381 |
| O | 14.51280698463428 | -5.46942597238272  | 49.69713003462189 |
| O | 21.34351100400783 | -7.62745700172003  | 49.65665099999433 |
| O | 20.91616402089468 | -4.71119101094311  | 48.06139600202062 |
| O | 18.25557499206339 | -4.32564699145745  | 47.68502400080805 |
| O | 23.74274400213028 | -5.61366600574374  | 54.16831999277097 |
| O | 18.53391599429017 | -0.79243401476921  | 49.48314899245386 |
| O | 20.52491099239986 | -4.34875200105820  | 55.18293700237192 |
| O | 20.00008799720579 | 0.41245099848886   | 55.96222000507066 |
| O | 19.85130200417328 | 2.01969601196704   | 49.63645499606432 |
| O | 19.53955700458074 | 0.46174699835395   | 51.90121700756075 |
| H | 14.09892554173047 | -3.07937621034477  | 49.59518366113348 |
| H | 13.77658898349281 | -1.60442736626817  | 50.54854723797425 |
| H | 12.78331785817729 | -1.99519830078855  | 49.10306479533396 |
| H | 12.84793946456699 | -4.04159482664829  | 51.23886935464341 |
| H | 11.18553348084295 | -1.05996497866435  | 50.27433514250909 |
| H | 9.60977494387063  | -3.47824544470828  | 52.33309563707552 |
| H | 10.96173347063986 | -4.55475593619119  | 52.33314021305528 |
| H | 14.19733665123568 | -0.47170274947215  | 59.24609547183113 |
| H | 15.41979606815272 | -0.87743473421830  | 60.48377935204955 |
| H | 14.72856478215102 | -2.14867324396206  | 59.45123383737484 |
| H | 15.88795668991759 | -1.20239139906874  | 57.45610796170957 |
| H | 16.41119236060842 | 0.20169971874916   | 58.38539281462462 |
| H | 17.95898406416305 | -1.88389295628464  | 56.83374494493623 |
| H | 19.20542378194350 | -2.30892992074663  | 57.95762589154523 |
| H | 8.06634637900618  | -0.35890125135802  | 60.10228929266981 |
| H | 8.63234009321635  | -0.96745940629971  | 61.67515962474414 |
| H | 7.39004401144297  | -1.85603347866835  | 60.78373384154708 |
| H | 11.48476667169112 | -3.02729036462662  | 57.74024052516579 |
| H | 9.87692129185383  | -0.99651714150837  | 58.03234011063095 |
| H | 11.34998705965964 | -4.59453609191539  | 59.68870809819234 |
| H | 8.43685369802614  | -3.78711493376741  | 49.36587762716691 |



|                     |                    |                   |
|---------------------|--------------------|-------------------|
| H 7.53487310570433  | -5.31156144191532  | 49.26559983405232 |
| H 9.15369034353834  | -5.28790070285998  | 49.99088984537195 |
| H 6.84135437290312  | -2.48753302945556  | 50.78305738304989 |
| H 8.28192924120817  | -6.33093729820799  | 52.12031691401587 |
| H 5.84829501841568  | -2.08844069760915  | 53.02060173843645 |
| H 7.25646529213052  | -5.94354382126410  | 54.34067856276232 |
| H 5.56403942091721  | -2.96119498933204  | 55.15409377296498 |
| H 5.65182029379378  | -10.36639629157515 | 54.68727275306755 |
| H 4.50356297271858  | -9.55623566604953  | 55.51663023562088 |
| H 6.83159568867685  | -10.74397996612394 | 56.81442769279881 |
| H 6.45308784070944  | -7.80362240252316  | 56.09930904003729 |
| H 7.50832415670987  | -8.93071095276259  | 55.21086374203126 |
| H 6.64201913131146  | -10.60205675625685 | 59.05515053916690 |
| H 5.33948302601857  | -9.83033917588823  | 59.87458172919934 |
| H 18.31634268058163 | -10.54224529589309 | 56.91125756979592 |
| H 16.34700400686706 | -9.38843814453359  | 56.85826611604249 |
| H 16.09987825514819 | -7.26938489229724  | 57.88368122926113 |
| H 17.48873195908249 | -7.63036969034416  | 58.95612135659698 |
| H 14.03155722335393 | -8.10196826882892  | 58.41991464322647 |
| H 12.62379270076950 | -8.17631071211142  | 60.40375665066742 |
| H 13.86456379633993 | -9.19115918303770  | 61.17186025591670 |
| H 13.03887930908419 | -10.08367599730651 | 57.91412501160934 |
| H 11.13898154415518 | -12.08396512150176 | 59.04221896144030 |
| H 10.87492544606468 | -11.23832440548425 | 57.50227782249150 |
| H 13.56859887784424 | -11.62159229707231 | 56.41376265190491 |
| H 14.66223276299135 | -14.11474683234020 | 56.17429200225600 |
| H 13.07383954852107 | -14.34657843604847 | 55.43639288690004 |
| H 15.14068665863891 | -12.20311457817423 | 54.65348450574660 |
| H 14.89851775035747 | -13.72013526027636 | 53.77778037872354 |
| H 12.69786794470252 | -12.99687123850270 | 52.98339591462337 |
| H 12.62130126181940 | -11.71142346359113 | 54.20353217370663 |
| H 14.50260744323995 | -10.52024883481485 | 53.14992351743685 |
| H 14.55750395637175 | -11.72118355399650 | 51.82703965792662 |
| H 12.03004837712262 | -10.24604388820113 | 52.36438891969049 |
| H 14.45662988657722 | -9.23373655515123  | 49.34254627355992 |
| H 15.03021561609100 | -9.44201343903389  | 50.93357487498485 |
| H 12.17842295933592 | -8.53408760510173  | 49.48920535663416 |
| H 23.32983895318963 | -6.51146923005195  | 47.31898097552730 |
| H 21.86803891003583 | -5.99285975011723  | 47.43222230814604 |
| H 18.91483709937508 | -7.71536125809489  | 49.92940395881769 |
| H 17.69250659878909 | -6.47191540023472  | 50.29685874523216 |
| H 17.29482994108731 | -8.16916992456026  | 50.53985583423844 |
| H 20.64451484876819 | -8.36852154802588  | 51.87640491352722 |
| H 18.81852194301579 | -6.23158985399059  | 55.02266948367971 |
| H 16.03080561479252 | -1.90125727615841  | 52.78273417357166 |
| H 17.33474525163200 | -1.07167563501750  | 51.88138271457785 |
| H 19.53071264443984 | -2.09470372215436  | 51.70862261167579 |
| H 19.71855235891600 | -2.96181125487462  | 53.25942657285275 |
| H 19.39305647016850 | -5.12796124637021  | 51.91393745583803 |
| H 19.57844964102492 | -4.17307706201536  | 50.44856768208896 |
| H 16.55691194937747 | -4.97721548653543  | 47.26287805817426 |
| H 15.21292720245486 | -5.29859403339842  | 47.94283032639898 |
| H 20.66895405433090 | -3.89294536002032  | 45.22665617093246 |
| H 19.68399586372108 | -3.15159816440282  | 46.11039352218738 |
| H 21.77674028077297 | -1.91072644779591  | 56.95768868085416 |
| H 20.60762031721034 | -1.13888630197708  | 56.26615234146433 |
| H 15.30126847911853 | -5.28654536458245  | 50.25955103655461 |
| H 13.91114535686197 | -5.97100539282120  | 50.27431484706851 |
| H 21.82043273553886 | -7.47864401225611  | 48.81357455624985 |
| H 21.35084250141469 | -6.74679330106584  | 50.07282555709965 |

|   |                   |                   |                   |
|---|-------------------|-------------------|-------------------|
| H | 21.26688151315014 | -4.65845705711012 | 48.99942021766109 |
| H | 21.09754371309011 | -3.87537706160223 | 47.59714674161950 |
| H | 19.12781862729148 | -4.68386314347022 | 47.94731761006839 |
| H | 17.89454597764976 | -3.89583159763156 | 48.49108388668230 |
| H | 24.48294483038754 | -5.85696566943334 | 53.59798017469972 |
| H | 23.12791392453959 | -5.10583418540764 | 53.57209458066519 |
| H | 18.89778223180243 | -0.47639509110076 | 50.32965362950506 |
| H | 18.06677684256612 | -1.62504428676163 | 49.70669767869438 |
| H | 20.69353877896995 | -3.47344901097180 | 55.58324944785258 |
| H | 20.96406359083657 | -4.32166645193330 | 54.31485061829842 |
| H | 20.62105209136157 | 0.83502195360678  | 55.35380905546150 |
| H | 19.20867799998021 | 0.22891485801910  | 55.38185538337286 |
| H | 19.36344464368064 | 1.36196022432012  | 49.11907683573686 |
| H | 19.74159586553055 | 1.66852220264093  | 50.54077080844013 |
| H | 20.37795826000153 | 0.03899083026805  | 52.12815634692836 |
| H | 18.95653503257355 | 0.32897670306749  | 52.70869394058573 |
| H | 20.87988296346964 | -7.53282940399903 | 54.32587262139980 |
| H | 9.81642939139029  | -1.38844847356741 | 51.24456362558949 |
| H | 11.13466794767251 | -9.52718199248061 | 50.35016439785390 |
| C | 23.42359100073798 | -8.02590198381899 | 52.09059499306058 |
| C | 24.59459600889400 | -7.46775301651851 | 51.29141301370392 |
| O | 25.66995099478599 | -8.08313599487339 | 51.17819199673693 |
| N | 24.38466198346064 | -6.23535901104437 | 50.75133198334571 |
| C | 25.38661900958906 | -5.62701598618377 | 49.89254300466861 |
| C | 24.76784500150703 | -4.52565500875629 | 49.02397999440267 |
| O | 22.29886200095623 | -7.55602600076960 | 55.23659600502450 |
| H | 17.39448807908626 | -3.45987287158265 | 54.31939689314221 |
| H | 23.07344295264253 | -7.31671731777887 | 52.83901224985190 |
| H | 23.73989959150668 | -8.95457534939811 | 52.57251125842885 |
| H | 22.60688791757465 | -8.21852449000612 | 51.38461233512038 |
| H | 23.45240262422048 | -5.78728276998099 | 50.78984387298411 |
| H | 26.20657616355957 | -5.20724589811917 | 50.49639773062916 |
| H | 25.83828515442896 | -6.41227979455495 | 49.27048386309917 |
| H | 24.36285640964072 | -3.71804254756164 | 49.64345897671812 |
| H | 23.93569389139230 | -4.92388455680360 | 48.43510276862003 |
| H | 25.51867059595912 | -4.10803341496634 | 48.34387193421868 |
| H | 22.86920250559070 | -6.81716232108348 | 54.89985056506588 |
| H | 22.82452287871736 | -8.35598807376194 | 55.11328596725159 |
